# Supplementary material for: Quantitative impacts of vertical transport on long-term trend of nocturnal ozone increase over the Pearl River Delta region during 2006–2019
Source: Copernicus journal article supplement (doi:10.5194/acp-2022-360), 2022-06-14
Supplement: Supplementary file 1 [file Supplementary.pdf › Supplementary.pdf]

## *Supplement of*

# **Quantitative impacts of vertical transport on long-term trend of nocturnal ozone increase over the Pearl River Delta region during 2006-2019**

Yongkang Wu<sup>1,2</sup>, Weihua Chen<sup>1,2,\*</sup>, Yingchang You<sup>1,2</sup>, Qianqian Xie<sup>1,2</sup>, Shiguo Jia<sup>3</sup>, Xuemei Wang<sup>1,2</sup>

<sup>1</sup>Institute for Environmental and Climate Research, Jinan University, Guangzhou, 510632, P. R. China

<sup>2</sup>Guangdong-Hongkong-Macau Joint Laboratory of Collaborative Innovation for Environmental Quality, Guangzhou 511443, China

<sup>3</sup>School of Atmospheric Sciences, Sun Yat-sen University and Southern Marine Science and Engineering Guangdong Laboratory (Zhuhai), Zhuhai, 519082, China

*Correspondence:* Weihua Chen (chenwh26@163.com)

**Table S1. Details of air quality monitoring stations**

| City      | Site                    | Area Type | Latitude | Longitude |
|-----------|-------------------------|-----------|----------|-----------|
| Dongguan  | Nanchengyuanling (NCYL) | urban     | 23.0     | 113.7     |
| Foshan    | Jinjuju (JJJ)           | rural     | 22.8     | 113.3     |
|           | Huijingcheng (HJC)      | urban     | 23.0     | 113.1     |
| Guangzhou | Luhu (LH)               | urban     | 23.2     | 113.3     |
|           | Wanqingsha (WQS)        | urban     | 22.7     | 113.5     |
|           | Tianhu (TH)             | rural     | 23.6     | 113.6     |
| Hong Kong | Tap Mun (TM)            | rural     | 22.5     | 114.4     |
|           | Tsuen Wan (TW)          | urban     | 22.4     | 114.1     |
|           | Tung Chung (TC)         | rural     | 22.3     | 113.9     |
| Huizhou   | Xiapu (XP)              | urban     | 23.1     | 114.4     |
|           | Jinguowan (JGW)         | urban     | 22.9     | 114.4     |
| Jiangmen  | Donghu (DH)             | urban     | 22.6     | 113.1     |
| Shenzhen  | Liyuan (LY)             | urban     | 22.5     | 114.1     |
| Zhuhai    | Tangjia (TJ)            | urban     | 22.4     | 113.6     |
| Zhaoqing  | Chengzhong (CZ)         | rural     | 23.1     | 112.5     |
| Zhongshan | Zimaling (ZML)          | urban     | 22.5     | 113.4     |

**Table S2. Details of meteorological stations**

| <b>City</b> | <b>Station</b> | <b>Latitude</b> | <b>Longitude</b> |
|-------------|----------------|-----------------|------------------|
| Dongguan    | Dongguan(DG)   | 23.0            | 113.8            |
| Foshan      | Shunde(SD)     | 22.8            | 113.2            |
| Guangzhou   | Guangzhou(GZ)  | 23.1            | 113.3            |
| Huizhou     | Huiyang(HY)    | 23.0            | 114.2            |
| Jiangmen    | Taishan(TS)    | 22.2            | 112.5            |
| Shenzhen    | Shenzhen(SZ)   | 22.6            | 114.1            |
| Zhuhai      | Zhuhai(ZH)     | 22.2            | 113.3            |
| Zhaoqing    | Gaoyao(GY)     | 23.0            | 112.5            |
| Zhongshan   | Zhongshan(ZS)  | 22.6            | 113.4            |

**Table S3. Statistical metrics of meteorological variables between observations and simulations in the PRD region during 8-14 September, 2017**

| Parameter                          | Site             | SIM <sub>mean</sub> | OBS <sub>mean</sub> | MB    | NMB (%) | NME (%) | r   | RMSE | IoA |
|------------------------------------|------------------|---------------------|---------------------|-------|---------|---------|-----|------|-----|
| Wind speed<br>(m s <sup>-1</sup> ) | GZ               | 1.3                 | 1.6                 | 0.3   | -23.5   | 42.3    | 0.5 | 0.9  | 0.9 |
|                                    | DG               | 1.3                 | 2.0                 | 0.7   | -33.8   | 47.9    | 0.4 | 1.1  | 0.9 |
|                                    | HY               | 1.8                 | 1.7                 | -0.1  | 6.5     | 52.3    | 0.4 | 1.1  | 0.9 |
|                                    | TS               | 2.7                 | 1.8                 | -0.9  | 50.1    | 65.4    | 0.5 | 1.5  | 0.9 |
|                                    | SD               | 2.9                 | 1.8                 | -1.1  | 60.5    | 76.3    | 0.3 | 1.8  | 0.9 |
|                                    | ZS               | 2.7                 | 1.6                 | -1.1  | 70.8    | 84.1    | 0.5 | 1.6  | 0.9 |
|                                    | ZH               | 2.0                 | 2.5                 | 0.5   | -21.4   | 44.6    | 0.4 | 1.4  | 0.9 |
|                                    | GY               | 2.2                 | 1.9                 | -0.3  | 14.9    | 59.9    | 0.3 | 1.5  | 0.9 |
|                                    | SZ               | 2.3                 | 1.5                 | -0.8  | 58.2    | 86.7    | 0.2 | 1.7  | 0.8 |
|                                    | Regional average | 2.1                 | 1.8                 | -0.3  | 16.1    | 29.0    | 0.7 | 0.7  | 1.0 |
| Relative humidity<br>(%)           | GZ               | 81.8                | 86.3                | 4.5   | -5.3    | 9.4     | 0.8 | 11.3 | 1.0 |
|                                    | DG               | 82.7                | 81.7                | -1.0  | 1.2     | 10.8    | 0.8 | 10.8 | 1.0 |
|                                    | HY               | 87.1                | 84.2                | -2.9  | 3.4     | 7.3     | 0.8 | 8.4  | 1.0 |
|                                    | TS               | 89.8                | 81.5                | -8.3  | 10.2    | 11.9    | 0.7 | 12.4 | 1.0 |
|                                    | SD               | 84.0                | 77.5                | -6.5  | 8.4     | 13.6    | 0.7 | 12.6 | 1.0 |
|                                    | ZS               | 86.7                | 81.5                | -5.2  | 6.3     | 10.1    | 0.7 | 10.8 | 1.0 |
|                                    | ZH               | 86.4                | 77.7                | -8.7  | 11.3    | 15.3    | 0.6 | 14.0 | 1.0 |
|                                    | GY               | 91.0                | 86.1                | -4.9  | 5.7     | 10.0    | 0.6 | 12.5 | 1.0 |
|                                    | SZ               | 91.4                | 77.7                | -13.7 | 17.6    | 17.8    | 0.7 | 15.8 | 1.0 |
|                                    | Regional average | 83.7                | 77.6                | -6.1  | 7.9     | 9.0     | 0.9 | 8.2  | 1.0 |
| Temperature<br>(°C)                | GZ               | 27.7                | 27.9                | 0.2   | -1.0    | 5.4     | 0.8 | 2.0  | 1.0 |
|                                    | DG               | 28.5                | 29.0                | 0.5   | -3.2    | 5.4     | 0.8 | 1.9  | 1.0 |
|                                    | HY               | 27.6                | 28.3                | 0.7   | -2.4    | 4.7     | 0.8 | 1.7  | 1.0 |
|                                    | TS               | 27.5                | 29.1                | 1.6   | -5.7    | 7.0     | 0.7 | 2.5  | 1.0 |
|                                    | SD               | 28.7                | 29.9                | 1.2   | -4.2    | 5.7     | 0.8 | 2.2  | 1.0 |
|                                    | ZS               | 28.1                | 28.9                | 0.8   | -2.7    | 4.1     | 0.9 | 1.5  | 1.0 |
|                                    | ZH               | 27.7                | 29.0                | 1.3   | -4.5    | 6.2     | 0.6 | 2.2  | 1.0 |
|                                    | GY               | 26.1                | 28.6                | 2.5   | -8.8    | 9.0     | 0.7 | 3.1  | 1.0 |
|                                    | SZ               | 27.7                | 27.9                | 0.2   | -5.4    | 5.8     | 0.7 | 2.1  | 1.0 |
|                                    | Regional average | 27.7                | 29.1                | 1.4   | -4.9    | 5.1     | 0.9 | 1.7  | 1.0 |

**Table S4. Statistical metrics for O<sub>3</sub> between observations and simulations in the PRD region during 8-14 September, 2017**

| <b>Site</b>         | <b>SIM<sub>mean</sub></b> | <b>OBS<sub>mean</sub></b> | <b>MB</b> | <b>NMB (%)</b> | <b>NME (%)</b> | <b>r</b> | <b>RMSE</b> | <b>IoA</b> |
|---------------------|---------------------------|---------------------------|-----------|----------------|----------------|----------|-------------|------------|
| LH                  | 33.2                      | 39.2                      | 6.1       | -14.5          | 31.8           | 0.8      | 30.0        | 0.9        |
| WQS                 | 62.2                      | 67.7                      | 5.5       | -8.1           | 36.8           | 0.8      | 37.7        | 0.9        |
| TH                  | 82.0                      | 77.7                      | -4.3      | 5.5            | 25.2           | 0.7      | 27.6        | 1.0        |
| LY                  | 42.2                      | 51.6                      | 9.4       | -18.3          | 39.7           | 0.8      | 29.9        | 0.9        |
| JJJ                 | 59.0                      | 59.5                      | 0.5       | -0.9           | 13.6           | 0.9      | 14.0        | 1.0        |
| HJC                 | 65.7                      | 78.7                      | 13.0      | -16.6          | 34.0           | 0.9      | 35.8        | 1.0        |
| TJ                  | 82.9                      | 78.7                      | -4.2      | 5.3            | 26.6           | 0.9      | 25.9        | 1.0        |
| DH                  | 49.7                      | 59.2                      | 9.5       | -16.0          | 32.8           | 0.9      | 26.2        | 1.0        |
| CZ                  | 87.9                      | 79.7                      | -8.2      | 10.3           | 21.1           | 0.9      | 30.7        | 1.0        |
| XP                  | 50.1                      | 55.3                      | 5.2       | -9.4           | 42.7           | 0.7      | 32.7        | 0.9        |
| JGW                 | 85.6                      | 58.0                      | -27.6     | 37.6           | 44.7           | 0.6      | 44.5        | 0.9        |
| ZML                 | 57.8                      | 70.4                      | 12.7      | -18.0          | 31.8           | 0.9      | 30.5        | 1.0        |
| NCYL                | 56.6                      | 61.0                      | 4.4       | -12.7          | 29.8           | 0.8      | 39.7        | 0.9        |
| TM                  | 88.9                      | 86.4                      | -2.5      | 2.9            | 29.1           | 0.8      | 33.2        | 1.0        |
| TW                  | 92.8                      | 64.0                      | -28.8     | 45.0           | 53.6           | 0.8      | 49.0        | 0.9        |
| TC                  | 93.0                      | 65.4                      | -27.5     | 42.1           | 57.3           | 0.8      | 48.4        | 0.9        |
| Regional<br>average | 75.8                      | 79.7                      | 3.9       | -4.8           | 17.7           | 1.0      | 18.7        | 1.0        |

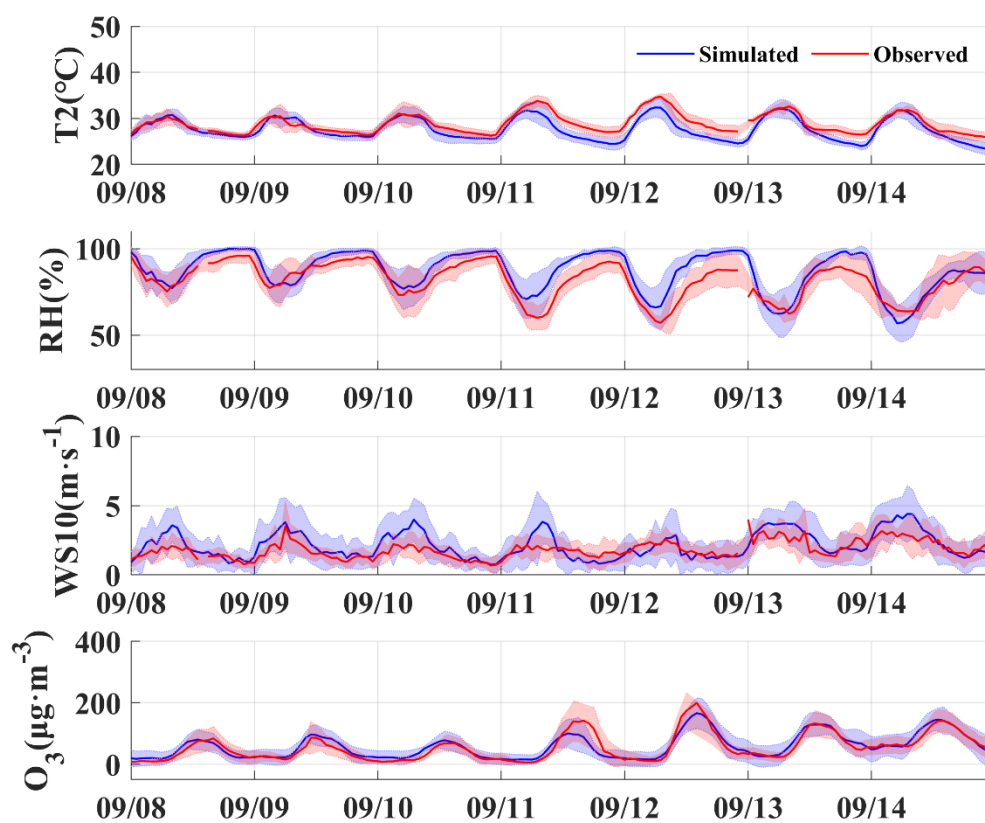

**Figure S1: Time series of temperature (T), relative humidity (RH), wind speed (WS), and  $\text{O}_3$  of PRD in the PRD region during 8-14 September, 2017.**
